# Supplementary material for: Insights into Brevibacillus borstelensis AK1 through Whole Genome Sequencing: A Thermophilic Bacterium Isolated from a Hot Spring in Saudi Arabia
Source: Biomed Res Int. 2018 May 24;2018:5862437. doi: 10.1155/2018/5862437 (PMC5994324; doi:10.1155/2018/5862437)
Supplement: Supplementary Materials — A list of putative genes (entries) of the strain AK1 based on KEGG orthology, KO (i.e., enzyme commission classification), that may possess a potential in degradation of polyethylene, hydrocarbons, and so forth. [file 5862437.f1.xlsx]

## Sheet: Cutinases
KO ID	KO Name
KO:K08095	cutinase [EC:3.1.1.74] (E3.1.1.74

## Sheet: Lipases
KO ID	KO Name
KO:K13278	60kDa lysophospholipase [EC:3.1.1.5 3.1.1.47 3.5.1.1] (ASPG)
KO:K01054	acylglycerol lipase [EC:3.1.1.23] (MGLL)
KO:K12536	ATP-binding cassette, subfamily C, bacterial exporter for protease/lipase (hasD, prtD, aprD)
KO:K12298	bile salt-stimulated lipase [EC:3.1.1.3 3.1.1.13] (CEL)
KO:K16343	calcium-independent phospholipase A2 [EC:3.1.1.4] (PLA2G6, IPLA2)
KO:K16815	calcium-independent phospholipase A2-gamma (PNPLA8)
KO:K13535	cardiolipin-specific phospholipase [EC:3.1.1.-] (CLD1)
KO:K14460	colipase (CLPS)
KO:K16342	cytosolic phospholipase A2 [EC:3.1.1.4] (PLA2G4, CPLA2)
KO:K13334	eosinophil lysophospholipase (galectin-10) [EC:3.1.1.5] (CLC)
KO:K14452	gastric triacylglycerol lipase [EC:3.1.1.3] (LIPF)
KO:K01127	glycosylphosphatidylinositol phospholipase D [EC:3.1.4.50] (E3.1.4.50)
KO:K07188	hormone-sensitive lipase [EC:3.1.1.79] (LIPE, HSL)
KO:K15375	inactive phospholipase C-like protein 1 (PLCL1, PRIP)
KO:K15370	inactive phospholipase C-like protein 2 (PLCL2)
KO:K16861	inactive phospholipase D5 (PLD5)
KO:K19771	lipase (LIPL4)
KO:K19311	lipase [EC:3.1.1.-] (lipV)
KO:K17900	lipase ATG15 [EC:3.1.1.3] (ATG15, AUT5)
KO:K19406	lipase-like abhydrolase domain-containing protein 3 [EC:3.1.1.-] (LIPM)
KO:K01059	lipoprotein lipase [EC:3.1.1.34] (LPL)
KO:K13333	lysophospholipase [EC:3.1.1.5] (PLB)
KO:K01048	lysophospholipase [EC:3.1.1.5] (pldB)
KO:K06128	lysophospholipase I [EC:3.1.1.5] (LYPLA1)
KO:K06130	lysophospholipase II [EC:3.1.1.5] (LYPLA2)
KO:K06129	lysophospholipase III [EC:3.1.1.5] (LYPLA3)
KO:K01052	lysosomal acid lipase/cholesteryl ester hydrolase [EC:3.1.1.13] (LIPA)
KO:K13985	N-acyl-phosphatidylethanolamine-hydrolysing phospholipase D [EC:3.1.4.54] (NAPEPLD)
KO:K12686	outer membrane lipase/esterase (apeE, estA, lip-1)
KO:K14074	pancreatic lipase-related protein 1 [EC:3.1.1.3] (PNLIPRP1, PLRP1)
KO:K14075	pancreatic lipase-related protein 2 [EC:3.1.1.3] (PNLIPRP2, PLRP2)
KO:K14076	pancreatic lipase-related protein 3 [EC:3.1.1.3] (PNLIPRP3, PLRP3)
KO:K14073	pancreatic triacylglycerol lipase [EC:3.1.1.3] (PNLIP, PL)
KO:K16813	patatin-like phospholipase domain-containing protein 1 [EC:3.1.1.-] (PNPLA1)
KO:K16816	patatin-like phospholipase domain-containing protein 2 [EC:3.1.1.3] (PNPLA2, ATGL)
KO:K13534	patatin-like phospholipase domain-containing protein 3 [EC:3.1.1.3 2.3.1.-] (PNPLA3)
KO:K11157	patatin-like phospholipase domain-containing protein 4 [EC:3.1.1.-] (PNPLA4)
KO:K16814	patatin-like phospholipase domain-containing protein 5 [EC:3.1.1.-] (PNPLA5)
KO:K19404	phosphatidic acid-selective&#160;phospholipase A1 [EC:3.1.1.-] (LIPH_I)
KO:K18694	phosphatidylglycerol phospholipase C [EC:3.1.4.-] (PGC1)
KO:K05858	phosphatidylinositol phospholipase C, beta [EC:3.1.4.11] (PLCB)
KO:K05857	phosphatidylinositol phospholipase C, delta [EC:3.1.4.11] (PLCD)
KO:K05860	phosphatidylinositol phospholipase C, epsilon [EC:3.1.4.11] (PLCE)
KO:K19006	phosphatidylinositol phospholipase C, eta [EC:3.1.4.11] (PLCH)
KO:K01116	phosphatidylinositol phospholipase C, gamma-1 [EC:3.1.4.11] (PLCG1)
KO:K05859	phosphatidylinositol phospholipase C, gamma-2 [EC:3.1.4.11] (PLCG2)
KO:K05861	phosphatidylinositol phospholipase C, zeta [EC:3.1.4.11] (PLCZ)
KO:K14018	phospholipase A-2-activating protein (PLAA, DOA1, UFD3)
KO:K01058	phospholipase A1 [EC:3.1.1.32 3.1.1.4] (pldA)
KO:K16818	phospholipase A1 [EC:3.1.1.32] (DAD1)
KO:K13618	phospholipase A1 member A [EC:3.1.1.-] (PLA1A)
KO:K14621	phospholipase B1, membrane-associated [EC:3.1.1.4 3.1.1.5] (PLB1, PLB)
KO:K16619	phospholipase C / alpha-toxin [EC:3.1.4.3] (plc, cpa)
KO:K01114	phospholipase C [EC:3.1.4.3] (plcC)
KO:K17717	phospholipase D [EC:3.1.4.4] (pld)
KO:K01115	phospholipase D1/2 [EC:3.1.4.4] (PLD1_2)
KO:K16860	phospholipase D3/4 [EC:3.1.4.4] (PLD3_4)
KO:K13619	phospholipase DDHD1 [EC:3.1.1.-] (DDHD1)
KO:K16545	phospholipase DDHD2 [EC:3.1.1.-] (DDHD2)
KO:K06999	phospholipase/carboxylesterase (K06999)
KO:K13357	putative meiotic phospholipase SPO1 [EC:3.1.1.-] (SPO1)
KO:K01047	secretory phospholipase A2 [EC:3.1.1.4] (PLA2G, SPLA2)
KO:K13806	sn1-specific diacylglycerol lipase [EC:3.1.1.-] (DAGL)
KO:K14675	TAG lipase / lysophosphatidylethanolamine acyltransferase [EC:3.1.1.3 2.3.1.-] (TGL3)
KO:K14674	TAG lipase / steryl ester hydrolase / phospholipase A2 / LPA acyltransferase [EC:3.1.1.3 3.1.1.13 3.1.1.4 2.3.1.51] (TGL4)
KO:K19772	triacylglycerol lipase (LIPS17)
KO:K01046	triacylglycerol lipase [EC:3.1.1.3] (E3.1.1.3)

## Sheet: Hydroxylases
KO ID	KO Name
KO:K09843	(+)-abscisic acid 8'-hydroxylase [EC:1.14.13.93] (E1.14.13.93)
KO:K13405	(S)-N-methylcoclaurine 3'-hydroxylase (CYP82B1)
KO:K18056	1-deoxypentalenic acid 11beta-hydroxylase [EC:1.14.11.35] (pntH, ptlH)
KO:K15955	13-deoxydaunorubicin hydroxylase [EC:1.14.13.181] (K15955, doxA)
KO:K10702	2-hydroxy-6-oxohepta-2,4-dienoate hydroxylase [EC:3.7.1.-] (todF)
KO:K03184	2-octaprenyl-3-methyl-6-methoxy-1,4-benzoquinol hydroxylase [EC:1.14.13.-] (ubiF)
KO:K03185	2-octaprenyl-6-methoxyphenol hydroxylase [EC:1.14.13.-] (ubiH)
KO:K18800	2-octaprenylphenol hydroxylase [EC:1.14.13.-] (ubiI)
KO:K07439	24-hydroxycholesterol 7alpha-hydroxylase [EC:1.14.13.99] (CYP39A1)
KO:K07438	25-hydroxyvitamin D3 1alpha-hydroxylase [EC:1.14.13.13] (CYP27B)
KO:K14985	26-hydroxylase [EC:1.14.-.-] (CYP18A1)
KO:K05712	3-(3-hydroxy-phenyl)propionate hydroxylase [EC:1.14.13.127] (mhpA)
KO:K10438	3-hydroxyphenylacetate 6-hydroxylase [EC:1.14.13.63] (E1.14.13.63, phacB)
KO:K10214	3alpha,7alpha,12alpha-trihydroxy-5beta-cholestanoyl-CoA 24-hydroxylase [EC:1.17.99.3] (ACOX2)
KO:K19703	4-hydroxysphinganine ceramide fatty acyl 2-hydroxylase [EC:1.14.18.6] (FA2H, SCS7)
KO:K15805	5-epiaristolochene 1,3-dihydroxylase [EC:1.14.13.119] (EAH)
KO:K18850	50S ribosomal protein L16 3-hydroxylase [EC:1.14.11.47] (ycfD)
KO:K14366	6-deoxyerythronolide B hydroxylase [EC:1.14.13.188] (eryF, CYP107A1)
KO:K15950	aklavinone 12-hydroxylase [EC:1.14.13.180] (dnrF, rdmE)
KO:K00476	aspartate beta-hydroxylase [EC:1.14.11.16] (ASPH)
KO:K17645	averantin hydroxylase [EC:1.14.13.174] (AVNA, CYP60A1)
KO:K15814	beta-amyrin 24-hydroxylase [EC:1.14.99.43] (CYP93E1)
KO:K15746	beta-carotene 3-hydroxylase [EC:1.14.13.129] (crtZ)
KO:K02294	beta-carotene hydroxylase [EC:1.14.13.-] (crtR)
KO:K12979	beta-hydroxylase [EC:1.14.11.-] (lpxO)
KO:K15747	beta-ring hydroxylase [EC:1.14.-.-] (LUT5, CYP97A3)
KO:K15928	bifunctional hydroxylase/dehydrase (jadH)
KO:K16914	bifunctional lysine-specific demethylase and histidyl-hydroxylase NO66 [EC:1.14.11.- 1.14.11.27] (NO66)
KO:K15945	C-1 hydroxylase (snoaL2)
KO:K07440	cholesterol 24(S)-hydroxylase [EC:1.14.13.98] (CYP46A1)
KO:K10223	cholesterol 25-hydroxylase [EC:1.14.99.38] (CH25H)
KO:K10721	CYP302A1; ecdysteroid 22-hydroxylase (DIB)
KO:K10720	CYP306A1; ecdysteroid 25-hydroxylase (PHM)
KO:K16379	cytochrome P450 C-9 hydroxylase (fkbD, rapJ)
KO:K14372	cytochrome P450 hydroxylase [EC:1.14.-.-] (aveE)
KO:K10717	cytokinin trans-hydroxylase (CYP735A)
KO:K12745	deacetoxycephalosporin-C hydroxylase [EC:1.14.11.26] (cefF)
KO:K12697	deacetoxyvindoline 4-hydroxylase [EC:1.14.11.20] (D4H)
KO:K19706	dihydroceramide fatty acyl 2-hydroxylase [EC:1.14.18.7] (FAH)
KO:K10722	ecdysteroid 2-hydroxylase (SAD, CYP315A1)
KO:K10674	ectoine hydroxylase [EC:1.14.11.-] (ectD)
KO:K16084	ent-cassa-12,15-diene 11-hydroxylase [EC:1.14.13.145] (CYP76M7)
KO:K16083	ent-isokaurene C2-hydroxylase [EC:1.14.13.143] (CYP71Z6)
KO:K04123	ent-kaurenoic acid hydroxylase [EC:1.14.13.79] (KAO)
KO:K14370	erythromycin 12 hydroxylase [EC:1.14.13.154] (eryK)
KO:K10700	ethylbenzene hydroxylase subunit alpha [EC:1.17.99.2] (ebdA)
KO:K17048	ethylbenzene hydroxylase subunit beta (ebdB)
KO:K17049	ethylbenzene hydroxylase subunit gamma (ebdC)
KO:K16839	FAD-dependent urate hydroxylase [EC:1.14.13.113] (hpxO)
KO:K15401	fatty acid omega-hydroxylase [EC:1.14.-.-] (CYP86A1)
KO:K15398	fatty acid omega-hydroxylase [EC:1.14.-.-] (CYP86A4S)
KO:K15402	fatty acid omega-hydroxylase [EC:1.14.-.-] (CYP86B1)
KO:K13407	fatty acid omega-hydroxylase [EC:1.14.-.-] (CYP94A1)
KO:K09755	ferulate-5-hydroxylase [EC:1.14.-.-] (CYP84A, F5H)
KO:K06892	feruloyl-CoA ortho-hydroxylase [EC:1.14.11.-] (F6H1)
KO:K13083	flavonoid 3',5'-hydroxylase [EC:1.14.13.88] (CYP75A)
KO:K13267	flavonoid 6-hydroxylase [EC:1.14.13.-] (CYP71D9, F6H)
KO:K16022	flavoprotein hydroxylase (rif19)
KO:K15099	geraniol 8-hydroxylase [EC:1.14.13.152] (CYP76B6, G10H)
KO:K16115	glycosyl transferase / beta-hydroxylase protein BlmF (blmF)
KO:K18055	hypoxia-inducible factor 1-alpha inhibitor (HIF hydroxylase) [EC:1.14.11.30] (HIF1AN)
KO:K06711	hypoxia-inducible factor prolyl 4-hydroxylase [EC:1.14.11.-] (PH-4)
KO:K09592	hypoxia-inducible factor prolyl hydroxylase [EC:1.14.11.29] (EGLN, HPH)
KO:K13260	isoflavone 2'-hydroxylase [EC:1.14.13.89] (CYP81E1_7)
KO:K17726	leukotriene-B4 20-monooxygenase / phylloquinone omega-hydroxylase [EC:1.14.13.30 1.14.13.194] (CYP4F2_3)
KO:K14732	limonene hydroxylase [EC:1.14.13.48 1.14.13.49 1.1.1.243 1.1.1.144] (K14732)
KO:K03897	lysine N6-hydroxylase [EC:1.14.13.59] (iucD)
KO:K13646	lysyl hydroxylase/galactosyltransferase/glucosyltransferase [EC:1.14.11.4 2.4.1.50 2.4.1.66] (PLOD3)
KO:K15405	midchain alkane hydroxylase (MAH1, CYP96A15)
KO:K07430	oxysterol 7-alpha-hydroxylase [EC:1.14.13.100] (CYP7B)
KO:K16249	phenol hydroxylase P0 protein (dmpK, poxA)
KO:K16243	Phenol hydroxylase P1 protein (dmpL, poxC)
KO:K16244	phenol hydroxylase P2 protein (dmpM, poxB)
KO:K16242	phenol hydroxylase P3 protein [EC:1.14.13.-] (dmpN, poxD)
KO:K16245	phenol hydroxylase P4 protein (dmpO, poxE)
KO:K16246	phenol hydroxylase P5 protein (dmpP, poxF)
KO:K10437	phenylacetate 2-hydroxylase [EC:1.14.13.-] (PHACA)
KO:K00500	phenylalanine-4-hydroxylase [EC:1.14.16.1] (phhA, PAH)
KO:K00477	phytanoyl-CoA hydroxylase [EC:1.14.11.18] (PHYH)
KO:K07336	PKHD-type hydroxylase [EC:1.14.11.-] (K07336)
KO:K00472	prolyl 4-hydroxylase [EC:1.14.11.2] (E1.14.11.2)
KO:K14672	putative polyketide hydroxylase (whiEVIII)
KO:K18242	salicylate 5-hydroxylase large subunit [EC:1.14.13.172] (nagG)
KO:K18243	salicylate 5-hydroxylase small subunit [EC:1.14.13.172] (nagH)
KO:K00480	salicylate hydroxylase [EC:1.14.13.1] (E1.14.13.1)
KO:K15958	SAM-dependent hydroxylase (rdmB)
KO:K15826	sesquiterpenoid omega-hydroxylase (CYP4C7)
KO:K09587	steroid 22-alpha-hydroxylase [EC:1.14.13.-] (CYP90B1, DWF4)
KO:K07431	sterol 12-alpha-hydroxylase [EC:1.14.18.8 1.14.13.96] (CYP8B1)
KO:K12696	tabersonine 16-hydroxylase [EC:1.14.13.73] (CYP71D12)
KO:K18228	taurochenodeoxycholate 6alpha-hydroxylase [EC:1.14.13.97] (CYP4A21)
KO:K14039	taxadiene 5alpha-hydroxylase [EC:1.14.99.37] (E1.14.99.37)
KO:K12924	taxane 10-beta-hydroxylase [EC:1.14.13.76] (CYP725A1)
KO:K12922	taxane 13-alpha-hydroxylase [EC:1.14.13.77] (CYP725A2)
KO:K06169	tRNA-(ms[2]io[6]A)-hydroxylase [EC:1.-.-.-] (miaE)
KO:K17475	tryprostatin B 6-hydroxylase [EC:1.14.13.176] (FTMC)
KO:K14952	UDP-MurNAc hydroxylase (namH)
KO:K07419	vitamin D 25-hydroxylase [EC:1.14.13.159] (CYP2R1)
KO:K07436	vitamin D3 24-hydroxylase [EC:1.14.13.126] (CYP24A1)

## Sheet: Laccses
KO ID	KO Name
KO:K05909	laccase [EC:1.10.3.2] (E1.10.3.2)
KO:K05810	laccase domain-containing protein (yfiH)

## Sheet: Phenol oxidases
KO ID	KO Name
KO:K00422	polyphenol oxidase [EC:1.10.3.1] (E1.10.3.1)

## Sheet: Proteases
KO ID	KO Name
KO:K11867	AMSH-like protease [EC:3.4.19.12] (STAMBPL1)
KO:K02084	apoptotic protease-activating factor (APAF1)
KO:K06985	aspartyl protease family protein (K06985)
KO:K12536	ATP-binding cassette, subfamily C, bacterial exporter for protease/lipase (hasD, prtD, aprD)
KO:K06891	ATP-dependent Clp protease adaptor protein ClpS (clpS)
KO:K03694	ATP-dependent Clp protease ATP-binding subunit ClpA (clpA)
KO:K03695	ATP-dependent Clp protease ATP-binding subunit ClpB (clpB)
KO:K03696	ATP-dependent Clp protease ATP-binding subunit ClpC (clpC)
KO:K03697	ATP-dependent Clp protease ATP-binding subunit ClpE (clpE)
KO:K04086	ATP-dependent Clp protease ATP-binding subunit ClpL (clpL)
KO:K03544	ATP-dependent Clp protease ATP-binding subunit ClpX (clpX, CLPX)
KO:K01358	ATP-dependent Clp protease, protease subunit [EC:3.4.21.92] (clpP, CLPP)
KO:K03667	ATP-dependent HslUV protease ATP-binding subunit HslU (hslU)
KO:K01419	ATP-dependent HslUV protease, peptidase subunit HslV [EC:3.4.25.2] (hslV, clpQ)
KO:K01338	ATP-dependent Lon protease [EC:3.4.21.53] (lon)
KO:K08955	ATP-dependent metalloprotease [EC:3.4.24.-] (YME1)
KO:K12688	autotransporter serine protease [EC:3.4.21.-] (sphB1, nalP, ausP)
KO:K03797	carboxyl-terminal processing protease [EC:3.4.21.102] (E3.4.21.102, prc, ctpA)
KO:K04489	caspase invertebrate, apoptosis-related cysteine protease [EC:3.4.22.-] (CASPN)
KO:K03798	cell division protease FtsH [EC:3.4.24.-] (ftsH, hflB)
KO:K13274	cell wall-associated protease [EC:3.4.21.-] (wprA)
KO:K09632	chymotrypsin-like protease [EC:3.4.21.-] (CTRL)
KO:K13441	cysteine protease (RCR3)
KO:K08342	cysteine protease ATG4 [EC:3.4.22.-] (ATG4)
KO:K13440	cysteine protease avirulence protein AvrPphB [EC:3.4.22.-] (avrPphB)
KO:K13439	cysteine protease avirulence protein AvrRpt2 [EC:3.4.22.-] (avrRpt2)
KO:K08315	hydrogenase 3 maturation protease [EC:3.4.23.51] (hycI)
KO:K03605	hydrogenase maturation protease [EC:3.4.23.-] (hyaD, hybD)
KO:K15619	Kunitz-type protease inhibitor 1 (SPINT1)
KO:K08642	LasA protease [EC:3.4.24.-] (lasA)
KO:K04076	Lon-like ATP-dependent protease [EC:3.4.21.-] (lonB)
KO:K04770	Lon-like ATP-dependent protease [EC:3.4.21.-] (lonH)
KO:K08675	Lon-like ATP-dependent protease [EC:3.4.21.-] (PRSS15, PIM1)
KO:K13275	major intracellular serine protease [EC:3.4.21.-] (isp)
KO:K03992	mannan-binding lectin serine protease 1 [EC:3.4.21.-] (MASP1)
KO:K03993	mannan-binding lectin serine protease 2 [EC:3.4.21.104] (MASP2)
KO:K09682	MarR family transcriptional regulator, protease production regulatory protein HPr (hpr)
KO:K12537	membrane fusion protein, protease secretion system (hasE, prtE)
KO:K04087	membrane protease subunit HflC [EC:3.4.-.-] (hflC)
KO:K04088	membrane protease subunit HflK [EC:3.4.-.-] (hflK)
KO:K07403	membrane-bound serine protease (ClpP class) (nfeD)
KO:K08653	membrane-bound transcription factor site-1 protease [EC:3.4.21.112] (MBTPS1)
KO:K14813	metalloprotease ARX1 [EC:3.-.-.-] (ARX1)
KO:K13277	minor extracellular protease Epr [EC:3.4.21.-] (epr)
KO:K14647	minor extracellular serine protease Vpr [EC:3.4.21.-] (vpr)
KO:K18156	mitochondrial inner membrane protease ATP23 [EC:3.4.24.-] (ATP23, XRCC6BP1)
KO:K09647	mitochondrial inner membrane protease subunit 1 [EC:3.4.21.-] (IMP1)
KO:K09648	mitochondrial inner membrane protease subunit 2 [EC:3.4.21.-] (IMP2)
KO:K17802	mitochondrial inner membrane protease subunit SOM1 (SOM1)
KO:K19416	modulator of FtsH protease (yccA)
KO:K13520	outer membrane protease [EC:3.4.23.-] (icsP, sopA)
KO:K08477	outer membrane protease E [EC:3.4.21.-] (pgtE)
KO:K12538	outer membrane protein, protease secretion system (hasF, prtF)
KO:K06972	presequence protease [EC:3.4.24.-] (PITRM1, PreP, CYM1)
KO:K01422	protease AXL1 [EC:3.4.24.-] (AXL1)
KO:K05520	protease I [EC:3.2.-.-] (pfpI)
KO:K01407	protease III [EC:3.4.24.55] (ptr)
KO:K04773	protease IV [EC:3.4.21.-] (sppA)
KO:K04775	protease YdgD [EC:3.4.21.-] (ydgD)
KO:K09628	protease, serine 27 [EC:3.4.21.-] (PRSS27)
KO:K09624	protease, serine, 12 (neurotrypsin, motopsin) [EC:3.4.21.-] (PRSS12)
KO:K09649	protease, serine, 16 (thymus) [EC:3.4.-.-] (PRSS16)
KO:K09625	protease, serine, 21 (testisin) [EC:3.4.21.-] (PRSS21)
KO:K09626	protease, serine, 22 [EC:3.4.21.-] (PRSS22)
KO:K09627	protease, serine, 23 [EC:3.4.21.-] (PRSS23)
KO:K09629	protease, serine, 33 (PRSS33)
KO:K09630	protease, serine, 36 [EC:3.4.21.-] (PRSS36)
KO:K01316	protease, serine, 7 (enterokinase) [EC:3.4.21.9] (PRSS7)
KO:K08664	protease, serine, 8 (prostasin) [EC:3.4.21.-] (PRSS8)
KO:K07387	putative metalloprotease [EC:3.4.24.-] (K07387)
KO:K16922	putative peptide zinc metalloprotease protein (yydH)
KO:K08303	putative protease [EC:3.4.-.-] (K08303)
KO:K07395	putative proteasome-type protease (K07395)
KO:K08372	putative serine protease PepD [EC:3.4.21.-] (pepD)
KO:K11749	regulator of sigma E protease [EC:3.4.24.-] (rseP)
KO:K19225	rhomboid protease GluP [EC:3.4.21.105] (gluP)
KO:K08592	sentrin-specific protease 1 [EC:3.4.22.68] (SENP1)
KO:K03345	sentrin-specific protease 2 (axin associating molecule) [EC:3.4.22.68] (SENP2, AXAM2)
KO:K08593	sentrin-specific protease 3 [EC:3.4.22.68] (SENP3)
KO:K08594	sentrin-specific protease 5 [EC:3.4.22.68] (SENP5)
KO:K08595	sentrin-specific protease 6 [EC:3.4.22.68] (SENP6)
KO:K08596	sentrin-specific protease 7 [EC:3.4.22.68] (SENP7)
KO:K08597	sentrin-specific protease 8 [EC:3.4.22.68] (SENP8, NEDP1, DEN1)
KO:K14645	serine protease [EC:3.4.21.-] (K14645)
KO:K17734	serine protease AprX [EC:3.4.21.-] (aprX)
KO:K12684	serine protease autotransporter [EC:3.4.21.-] (esp, sigA, sepA)
KO:K04772	serine protease DegQ [EC:3.4.21.-] (degQ, hhoA)
KO:K04691	serine protease DegS [EC:3.4.21.-] (hhoB, degS)
KO:K04771	serine protease Do [EC:3.4.21.107] (degP, htrA)
KO:K04774	serine protease SohB [EC:3.4.21.-] (sohB)
KO:K06012	spore protease [EC:3.4.24.78] (gpr)
KO:K12685	subtilase-type serine protease [EC:3.4.21.-] (ssp)
KO:K10913	TetR/AcrR family transcriptional regulator, hemagglutinin/protease regulatory protein (hapR, luxR, litR)
KO:K08586	thiol protease [EC:3.4.22.-] (tpr)
KO:K09750	transmembrane protease, serine 11A [EC:3.4.21.-] (TMPRSS11A)
KO:K09751	transmembrane protease, serine 11B [EC:3.4.21.-] (TMPRSS11B)
KO:K14359	transmembrane protease, serine 11C [EC:3.4.21.-] (TMPRSS11C)
KO:K09641	transmembrane protease, serine 11D [EC:3.4.21.-] (TMPRSS11D)
KO:K09642	transmembrane protease, serine 11E [EC:3.4.21.-] (TMPRSS11E)
KO:K09752	transmembrane protease, serine 11F [EC:3.4.21.-] (TMPRSS11F)
KO:K18769	transmembrane protease, serine 11G [EC:3.4.21.-] (TMPRSS11G)
KO:K09643	transmembrane protease, serine 13 (TMPRSS13, TMPRSS11)
KO:K09633	transmembrane protease, serine 2 (TMPRSS2)
KO:K09634	transmembrane protease, serine 3 [EC:3.4.21.-] (TMPRSS3)
KO:K09635	transmembrane protease, serine 4 (TMPRSS4)
KO:K09636	transmembrane protease, serine 5 (spinesin) [EC:3.4.21.-] (TMPRSS5)
KO:K09637	transmembrane protease, serine 6 [EC:3.4.21.-] (TMPRSS6)
KO:K09638	transmembrane protease, serine 7 [EC:3.4.21.-] (TMPRSS7)
KO:K09639	transmembrane protease, serine 8 [EC:3.4.21.-] (TMPRSS8)
KO:K09640	transmembrane protease, serine 9 [EC:3.4.21.-] (TMPRSS9)
KO:K08676	tricorn protease [EC:3.4.21.-] (tri)
KO:K13722	tricorn protease interacting factor F2/3 [EC:3.4.11.-] (trf2_3)
KO:K16287	ubiquitin-like-specific protease 1C/D [EC:3.4.22.68] (ULP1C_D)
KO:K08598	YopJ protease family (yopJ)
KO:K08643	zinc metalloprotease ZmpB [EC:3.4.24.-] (zmpB)
KO:K07263	zinc protease [EC:3.4.24.-] (pqqL)

## Sheet: Monooxygenases
KO ID	KO Name
KO:K00459	nitronate monooxygenase [EC:1.13.12.16] (ncd2, npd)
KO:K00466	tryptophan 2-monooxygenase [EC:1.13.12.3] (E1.13.12.3)
KO:K00467	lactate 2-monooxygenase [EC:1.13.12.4] (E1.13.12.4)
KO:K00481	p-hydroxybenzoate 3-monooxygenase [EC:1.14.13.2] (pobA)
KO:K00483	4-hydroxyphenylacetate 3-monooxygenase [EC:1.14.14.9] (hpaB)
KO:K00485	dimethylaniline monooxygenase (N-oxide forming) [EC:1.14.13.8] (FMO)
KO:K00486	kynurenine 3-monooxygenase [EC:1.14.13.9] (KMO)
KO:K00487	trans-cinnamate 4-monooxygenase [EC:1.14.13.11] (CYP73A)
KO:K00488	cholestanetriol 26-monooxygenase [EC:1.14.13.15] (CYP27A)
KO:K00489	cholesterol 7alpha-monooxygenase [EC:1.14.13.17] (CYP7A1)
KO:K00493	unspecific monooxygenase [EC:1.14.14.1] (E1.14.14.1)
KO:K00494	alkanal monooxygenase alpha chain [EC:1.14.14.3] (luxA)
KO:K00496	alkane 1-monooxygenase [EC:1.14.15.3] (alkB1_2)
KO:K00497	steroid 11beta-monooxygenase [EC:1.14.15.4] (CYP11B1)
KO:K00498	cholesterol monooxygenase (side-chain-cleaving) [EC:1.14.15.6] (CYP11A)
KO:K00499	choline monooxygenase [EC:1.14.15.7] (E1.14.15.7)
KO:K00501	tyrosine 3-monooxygenase [EC:1.14.16.2] (TH)
KO:K00502	tryptophan 5-monooxygenase [EC:1.14.16.4] (TPH1_2)
KO:K00503	dopamine beta-monooxygenase [EC:1.14.17.1] (DBH)
KO:K00504	peptidylglycine monooxygenase [EC:1.14.17.3] (PAM, PHM)
KO:K00511	squalene monooxygenase [EC:1.14.14.17] (SQLE, ERG1)
KO:K00512	steroid 17alpha-monooxygenase / 17alpha-hydroxyprogesterone aldolase [EC:1.14.14.19 4.1.2.30] (CYP17A)
KO:K00513	steroid 21-monooxygenase [EC:1.14.14.16] (CYP21A)
KO:K02508	AraC family transcriptional regulator, 4-hydroxyphenylacetate 3-monooxygenase operon regulatory protein (hpaA)
KO:K03379	cyclohexanone monooxygenase [EC:1.14.13.22] (E1.14.13.22)
KO:K03380	phenol 2-monooxygenase [EC:1.14.13.7] (E1.14.13.7)
KO:K03391	pentachlorophenol monooxygenase [EC:1.14.13.50] (E1.14.13.50)
KO:K03862	vanillate O-demethylase monooxygenase subunit [EC:1.14.13.82] (vanA)
KO:K04091	alkanesulfonate monooxygenase [EC:1.14.14.5] (ssuD)
KO:K04713	sphinganine C4-monooxygenase [EC:1.14.18.5] (SUR2)
KO:K05280	flavonoid 3'-monooxygenase [EC:1.14.13.21] (E1.14.13.21)
KO:K05525	linalool 8-monooxygenase [EC:1.14.13.151] (cyp111, linC)
KO:K05914	photinus-luciferin 4-monooxygenase (ATP-hydrolysing) [EC:1.13.12.7] (E1.13.12.7)
KO:K06072	deoxyhypusine monooxygenase [EC:1.14.99.29] (DOHH)
KO:K06126	ubiquinone biosynthesis monooxygenase Coq6 [EC:1.14.13.-] (COQ6)
KO:K06134	ubiquinone biosynthesis monooxygenase Coq7 [EC:1.14.13.-] (COQ7)
KO:K07381	(S)-limonene 6-monooxygenase [EC:1.14.13.48] (CYP71D18)
KO:K07382	(S)-limonene 7-monooxygenase [EC:1.14.13.49] (E1.14.13.49)
KO:K07425	alkane 1-monooxygenase [EC:1.14.15.3] (CYP4A)
KO:K07433	steroid 11beta-monooxygenase / corticosterone 18-monooxygenase [EC:1.14.15.4 1.14.15.5] (CYP11B2)
KO:K07750	methylsterol monooxygenase [EC:1.14.13.72] (E1.14.13.72, SC4MOL, ERG25)
KO:K07824	benzoate 4-monooxygenase [EC:1.14.13.12] (E1.14.13.12)
KO:K08080	CMP-N-acetylneuraminate monooxygenase [EC:1.14.18.2] (CMAH)
KO:K09461	anthraniloyl-CoA monooxygenase [EC:1.14.13.40] (E1.14.13.40)
KO:K09754	coumaroylquinate(coumaroylshikimate) 3'-monooxygenase [EC:1.14.13.36] (CYP98A3, C3'H)
KO:K09837	carotene epsilon-monooxygenase [EC:1.14.99.45] (LUT1, CYP97C1)
KO:K09847	spheroidene monooxygenase [EC:1.14.15.9] (crtA)
KO:K10215	monooxygenase [EC:1.14.13.-] (ethA)
KO:K10616	p-cymene monooxygenase [EC:1.14.13.-] (cymAa)
KO:K10676	2,4-dichlorophenol 6-monooxygenase [EC:1.14.13.20] (tfdB)
KO:K10723	ecdysone 20-monooxygenase [EC:1.14.99.22] (SHD, CYP314A1)
KO:K10944	methane/ammonia monooxygenase subunit A [EC:1.14.18.3 1.14.99.39] (pmoA-amoA)
KO:K10945	methane/ammonia monooxygenase subunit B (pmoB-amoB)
KO:K10946	methane/ammonia monooxygenase subunit C (pmoC-amoC)
KO:K11812	tryptophan N-monooxygenase [EC:1.14.13.125] (CYP79B2)
KO:K11813	tryptophan N-monooxygenase [EC:1.14.13.125] (CYP79B3)
KO:K11816	indole-3-pyruvate monooxygenase [EC:1.14.13.168] (YUCCA)
KO:K12153	phenylalanine N-monooxygenase [EC:1.14.13.124] (CYP79A2)
KO:K12637	3-epi-6-deoxocathasterone 23-monooxygenase [EC:1.14.13.112] (CYP90C1, ROT3)
KO:K12638	3-epi-6-deoxocathasterone 23-monooxygenase [EC:1.14.13.112] (CYP90D1)
KO:K12645	epi-isozizaene 5-monooxygenase [EC:1.14.13.106] (CYP170A1)
KO:K12917	cytochrome P450 monooxygenase 1 (P450I)
KO:K12918	cytochrome P450 monooxygenase 2 (P450II)
KO:K12919	cytochrome P450 monooxygenase 3 (P450III)
KO:K13027	tyrosine N-monooxygenase [EC:1.14.13.41] (CYP79A1)
KO:K13029	4-hydroxyphenylacetaldehyde oxime monooxygenase [EC:1.14.13.68] (CYP71E1)
KO:K13223	indole-2-monooxygenase [EC:1.14.13.137] (BX2, CYP71C4)
KO:K13224	indolin-2-one monooxygenase [EC:1.14.13.138] (BX3, CYP71C2)
KO:K13225	3-hydroxyindolin-2-one monooxygenase [EC:1.14.13.139] (BX4, CYP71C1)
KO:K13226	benzoxazinone N-monooxygenase [EC:1.14.13.140] (BX5, CYP71C3)
KO:K13261	3,9-dihydroxypterocarpan 6a-monooxygenase [EC:1.14.13.28] (CYP93A1)
KO:K13385	N-methylcoclaurine 3'-monooxygenase [EC:1.14.13.71] (CYP80B)
KO:K13401	valine N-monooxygenase [EC:1.14.13.118] (CYP79D1_2)
KO:K13561	4-(gamma-L-glutamylamino)butanoyl-[BtrI acyl-carrier protein] monooxygenase [EC:1.14.14.13] (btrO)
KO:K14253	monooxygenase [EC:1.14.-.-] (oxyE)
KO:K14256	anhydrotetracycline monooxygenase [EC:1.14.13.38] (oxyS)
KO:K14481	styrene monooxygenase [EC:1.14.14.11] (styA)
KO:K14482	styrene monooxygenase reductase component [EC:1.5.1.-] (styB)
KO:K14520	4-hydroxyacetophenone monooxygenase [EC:1.14.13.84] (hapE)
KO:K14586	2-naphthoate monooxygenase (nmoAB)
KO:K14630	two-component flavin-dependent monooxygenase [EC:1.14.14.-] (actVA5)
KO:K14632	C-6 monooxygenase (actVA6)
KO:K14673	putative monooxygenase (whiEII)
KO:K14733	limonene 1,2-monooxygenase [EC:1.14.13.107] (limB)
KO:K14974	6-hydroxynicotinate 3-monooxygenase [EC:1.14.13.114] (nicC)
KO:K14984	isoleucine N-monooxygenase [EC:1.14.13.117] (CYP79D3_4)
KO:K15089	(S)-limonene 3-monooxygenase [EC:1.14.13.47] (CYP71D13_15_95)
KO:K15245	chlorophenol-4-monooxygenase component 1 [EC:1.5.1.37] (tftC)
KO:K15246	chlorophenol-4-monooxygenase component 2 [EC:1.14.13.-] (tftD)
KO:K15319	monooxygenase (APTC)
KO:K15359	6-hydroxy-3-succinoylpyridine 3-monooxygenase [EC:1.14.13.163] (hspA)
KO:K15386	cytochrome P450 monooxygenase (APDB)
KO:K15387	FAD-dependent monooxygenase (APDD)
KO:K15388	cytochrome P450 monooxygenase (APDE)
KO:K15470	cytochrome P450 monooxygenase (rhiH)
KO:K15537	alkylglycerol monooxygenase [EC:1.14.16.5] (AGMO)
KO:K15757	xylene monooxygenase subunit XylM [EC:1.14.13.-] (xylM)
KO:K15758	xylene monooxygenase electron transfer component [EC:1.18.1.3] (xylA1)
KO:K15760	toluene monooxygenase system protein A [EC:1.14.13.-] (tmoA, tbuA1, touA)
KO:K15761	toluene monooxygenase system protein B [EC:1.14.13.-] (tmoB, tbuU, touB)
KO:K15762	toluene monooxygenase system ferredoxin subunit (tmoC, tbuB, touC)
KO:K15763	toluene monooxygenase system protein D [EC:1.14.13.-] (tmoD, tbuV, touD)
KO:K15764	toluene monooxygenase system protein E [EC:1.14.13.-] (tmoE, tbuA2, touE)
KO:K15765	toluene monooxygenase electron transfer component [EC:1.18.1.3] (tmoF, tbuC, touF)
KO:K15768	p-toluenesulfonate methyl-monooxygenase oxygenase component TsaM [EC:1.14.13.-] (tsaM)
KO:K15769	p-toluenesulfonate methyl-monooxygenase reductase component TsaB [EC:1.14.13.-] (tsaB1)
KO:K15854	alkanal monooxygenase beta chain [EC:1.14.14.3] (luxB)
KO:K15941	deoxynogalonate / 12-deoxyaklanonic acid monooxygenase [EC:1.13.12.22 1.13.12.-] (snoaB, dnrG, aknX)
KO:K15966	monooxygenase [EC:1.14.13.-] (mtmOIV)
KO:K15969	tetracenomycin F1 monooxygenase [EC:1.13.12.21] (tcmH)
KO:K15972	tetracenomycin A2 monooxygenase-dioxygenase [EC:1.14.13.200] (tcmG, elmG)
KO:K15981	cholest-4-en-3-one 26-monooxygenase [EC:1.14.13.141] (CYP125A1)
KO:K15982	3-ketosteroid 9alpha-monooxygenase subunit A [EC:1.14.13.142] (kshA)
KO:K15983	3-ketosteroid 9alpha-monooxygenase subunit B [EC:1.14.13.142] (kshB)
KO:K15991	20-oxo-5-O-mycaminosyltylactone 23-monooxygenase [EC:1.14.13.186] (tylHI)
KO:K16008	cytochrome P450 monooxygenase OleP (oleP)
KO:K16047	3-hydroxy-9,10-secoandrosta-1,3,5(10)-triene-9,17-dione monooxygenase [EC:1.14.14.12] (hsaA)
KO:K16048	3-hydroxy-9,10-secoandrosta-1,3,5(10)-triene-9,17-dione monooxygenase reductase component [EC:1.5.1.-] (hsaB)
KO:K16157	methane monooxygenase component A alpha chain [EC:1.14.13.25] (mmoX)
KO:K16158	methane monooxygenase component A beta chain [EC:1.14.13.25] (mmoY)
KO:K16159	methane monooxygenase component A gamma chain [EC:1.14.13.25] (mmoZ)
KO:K16160	methane monooxygenase regulatory protein B (mmoB)
KO:K16161	methane monooxygenase component C [EC:1.14.13.25] (mmoC)
KO:K16162	methane monooxygenase component D (mmoD)
KO:K16265	2-methylbutanal oxime monooxygenase [EC:1.14.13.-] (CYP71E7)
KO:K16389	cytochrome P450 monooxygenase (amphN, nysN, fscP, pimG)
KO:K16390	cytochrome P450 monooxygenase (amphL, nysL, pimD)
KO:K16415	cytochrome P450 dependent monooxygenase (stiL)
KO:K16901	anthranilate 3-monooxygenase (FAD) / 4-hydroxyphenylacetate 3-monooxygenase [EC:1.14.14.8 1.14.14.9] (K16901)
KO:K16967	dimethyl-sulfide monooxygenase [EC:1.14.13.131] (dmoA)
KO:K16968	methanesulfonate monooxygenase large subunit [EC:1.14.13.111] (msmA)
KO:K16969	methanesulfonate monooxygenase small subunit [EC:1.14.13.111] (msmB)
KO:K17228	FMNH2-dependent dimethyl sulfone monooxygenase (sfnG)
KO:K17643	noranthrone monooxygenase [EC:1.13.12.20] (HYPC)
KO:K17687	alkane 1-monooxygenase [EC:1.14.15.3] (CYP4A11)
KO:K17688	alkane 1-monooxygenase [EC:1.14.15.3] (CYP4A22)
KO:K17726	leukotriene-B4 20-monooxygenase / phylloquinone omega-hydroxylase [EC:1.14.13.30 1.14.13.194] (CYP4F2_3)
KO:K17826	fumitremorgin C monooxygenase [EC:1.14.13.177] (FTMG)
KO:K18004	HQNO biosynthesis monooxygenase PqsL (pqsL)
KO:K18053	renilla-luciferin 2-monooxygenase [EC:1.13.12.5] (luci)
KO:K18221	tetracycline resistance monooxygenase (K18221, tetX)
KO:K18223	propane monooxygenase large subunit [EC:1.14.13.-] (prmA)
KO:K18224	propane monooxygenase small subunit [EC:1.14.13.-] (prmC)
KO:K18225	propane monooxygenase reductase subunit [EC:1.18.1.-] (prmB)
KO:K18226	propane monooxygenase coupling protein (prmD)
KO:K18229	phenylacetone monooxygenase [EC:1.14.13.92] (PAMO)
KO:K18276	6-hydroxy-3-succinoylpyridine 3-monooxygenase [EC:1.14.13.163] (hspB)
KO:K18277	trimethylamine monooxygenase [EC:1.14.13.148] (tmm)
KO:K18293	p-cymene monooxygenase electron transfer component [EC:1.18.1.3] (cymAb)
KO:K18371	acetone monooxygenase [EC:1.14.13.-] (acmA)
KO:K18386	FAD dependent monooxygenase [EC:1.14.13.-] (PAXM, ATMM, LTMM)
KO:K18388	cytochrome P450 monooxygenase [EC:1.14.13.-] (PAXP, ATMP)
KO:K18389	cytochrome P450 monooxygenase [EC:1.14.13.-] (PAXQ, ATMQ)
KO:K18392	cytochrome P450 monooxygenase [EC:1.14.13.-] (LTMP, TERP)
KO:K18393	cytochrome P450 monooxygenase [EC:1.14.13.-] (LTMQ, TERQ)
KO:K18395	cytochrome P450 monooxygenase [EC:1.14.13.-] (LTMJ)
KO:K18397	cytochrome P450 monooxygenase [EC:1.14.21.-] (LTMK)
KO:K19065	3-hydroxybenzoate 4-monooxygenase [EC:1.14.13.23] (mobA)
KO:K19189	2,6-dihydroxypyridine 3-monooxygenase [EC:1.14.13.10] (dhpH)

## Sheet: Dioxygenases
KO ID	KO Name
KO:K00446	catechol 2,3-dioxygenase [EC:1.13.11.2] (dmpB, xylE)
KO:K00448	protocatechuate 3,4-dioxygenase, alpha subunit [EC:1.13.11.3] (pcaG)
KO:K00449	protocatechuate 3,4-dioxygenase, beta subunit [EC:1.13.11.3] (pcaH)
KO:K00450	gentisate 1,2-dioxygenase [EC:1.13.11.4] (E1.13.11.4)
KO:K00451	homogentisate 1,2-dioxygenase [EC:1.13.11.5] (HGD, hmgA)
KO:K00452	3-hydroxyanthranilate 3,4-dioxygenase [EC:1.13.11.6] (HAAO)
KO:K00453	tryptophan 2,3-dioxygenase [EC:1.13.11.11] (E1.13.11.11, TDO2)
KO:K00455	3,4-dihydroxyphenylacetate 2,3-dioxygenase [EC:1.13.11.15] (hpaD, hpcB)
KO:K00456	cysteine dioxygenase [EC:1.13.11.20] (CDO1)
KO:K00457	4-hydroxyphenylpyruvate dioxygenase [EC:1.13.11.27] (HPD, hppD)
KO:K00462	biphenyl-2,3-diol 1,2-dioxygenase [EC:1.13.11.39] (bphC)
KO:K00463	indoleamine 2,3-dioxygenase [EC:1.13.11.52] (INDO)
KO:K00471	gamma-butyrobetaine dioxygenase [EC:1.14.11.1] (E1.14.11.1)
KO:K00473	procollagen-lysine,2-oxoglutarate 5-dioxygenase 1 [EC:1.14.11.4] (PLOD1)
KO:K00474	trimethyllysine dioxygenase [EC:1.14.11.8] (TMLHE)
KO:K00475	naringenin 3-dioxygenase [EC:1.14.11.9] (E1.14.11.9)
KO:K00515	beta-carotene 15,15'-dioxygenase [EC:1.13.11.63] (BCMO1, BCDO1)
KO:K00529	3-phenylpropionate/trans-cinnamate dioxygenase ferredoxin reductase subunit [EC:1.18.1.3] (hcaD)
KO:K03119	taurine dioxygenase [EC:1.14.11.17] (tauD)
KO:K03268	benzene/toluene dioxygenase alpha subunit [EC:1.14.12.3 1.14.12.11] (todC1, bedC1)
KO:K03381	catechol 1,2-dioxygenase [EC:1.13.11.1] (catA)
KO:K04098	hydroxyquinol 1,2-dioxygenase [EC:1.13.11.37] (chqB)
KO:K04099	gallate dioxygenase [EC:1.13.11.57] (desB, galA)
KO:K04100	protocatechuate 4,5-dioxygenase, alpha chain [EC:1.13.11.8] (ligA)
KO:K04101	protocatechuate 4,5-dioxygenase, beta chain [EC:1.13.11.8] (ligB)
KO:K04124	gibberellin 3-beta-dioxygenase [EC:1.14.11.15] (E1.14.11.15)
KO:K05277	leucoanthocyanidin dioxygenase [EC:1.14.11.19] (E1.14.11.19)
KO:K05549	benzoate/toluate 1,2-dioxygenase alpha subunit [EC:1.14.12.10 1.14.12.-] (benA-xylX)
KO:K05550	benzoate/toluate 1,2-dioxygenase beta subunit [EC:1.14.12.10 1.14.12.-] (benB-xylY)
KO:K05599	anthranilate 1,2-dioxygenase (deaminating, decarboxylating) large subunit [EC:1.14.12.1] (antA)
KO:K05600	anthranilate 1,2-dioxygenase (deaminating, decarboxylating) small subunit [EC:1.14.12.1] (antB)
KO:K05708	3-phenylpropionate/trans-cinnamate dioxygenase alpha subunit [EC:1.14.12.19] (hcaE, hcaA1)
KO:K05709	3-phenylpropionate/trans-cinnamate dioxygenase beta subunit [EC:1.14.12.19] (hcaF, hcaA2)
KO:K05710	3-phenylpropionate/trans-cinnamate dioxygenase ferredoxin subunit (hcaC)
KO:K05713	2,3-dihydroxyphenylpropionate 1,2-dioxygenase [EC:1.13.11.16] (mhpB)
KO:K05784	benzoate/toluate 1,2-dioxygenase reductase subunit [EC:1.18.1.-] (benC-xylZ)
KO:K05913	2,4'-dihydroxyacetophenone dioxygenase [EC:1.13.11.41] (E1.13.11.41)
KO:K05916	nitric oxide dioxygenase [EC:1.14.12.17] (hmp, YHB1)
KO:K06912	alpha-ketoglutarate-dependent 2,4-dichlorophenoxyacetate dioxygenase [EC:1.14.11.-] (tfdA)
KO:K07104	catechol 2,3-dioxygenase [EC:1.13.11.2] (catE)
KO:K07155	quercetin 2,3-dioxygenase [EC:1.13.11.24] (qodI)
KO:K08686	2-chlorobenzoate 1,2-dioxygenase [EC:1.14.12.13] (E1.14.12.13)
KO:K08689	biphenyl 2,3-dioxygenase alpha subunit [EC:1.14.12.18] (bphAa, bphA1, bphA)
KO:K08967	1,2-dihydroxy-3-keto-5-methylthiopentene dioxygenase [EC:1.13.11.53 1.13.11.54] (mtnD, mtnZ, ADI1)
KO:K09840	9-cis-epoxycarotenoid dioxygenase [EC:1.13.11.51] (NCED)
KO:K10252	beta,beta-carotene 9',10'-dioxygenase [EC:1.13.11.71] (BCDO2)
KO:K10253	DOPA 4,5-dioxygenase [EC:1.14.99.-] (K10253)
KO:K10529	alpha-dioxygenase [EC:1.-.-.-] (DOX1)
KO:K10619	p-cumate 2,3-dioxygenase alpha subunit [EC:1.14.12.-] (cmtAb)
KO:K10621	2,3-dihydroxy-p-cumate/2,3-dihydroxybenzoate 3,4-dioxygenase [EC:1.13.11.- 1.13.11.14] (cmtC, dhbA)
KO:K10712	cysteamine dioxygenase [EC:1.13.11.19] (ADO)
KO:K10859	alpha-ketoglutarate-dependent dioxygenase alkB homolog 2 [EC:1.14.11.-] (ALKBH2)
KO:K10860	alpha-ketoglutarate-dependent dioxygenase alkB homolog 3 [EC:1.14.11.-] (ALKBH3, DEPC1)
KO:K11159	carotenoid cleavage dioxygenase (K11159)
KO:K11311	anthranilate 1,2-dioxygenase reductase subunit [EC:1.18.1.-] (antC)
KO:K11943	PAH dioxygenase large subunit [EC:1.13.11.-] (nidA)
KO:K11944	PAH dioxygenase small subunit [EC:1.13.11.-] (nidB)
KO:K11945	extradiol dioxygenase [EC:1.13.11.-] (phdF)
KO:K11948	1-hydroxy-2-naphthoate dioxygenase [EC:1.13.11.38] (phdI)
KO:K12692	hyoscyamine (6S)-dioxygenase [EC:1.14.11.11] (H6H)
KO:K12905	2-hydroxyethylphosphonate dioxygenase [EC:1.13.11.72] (phpD)
KO:K13097	methylcytosine dioxygenase [EC:1.14.11.-] (TET1)
KO:K13229	2,4-dihydroxy-1,4-benzoxazin-3-one-glucoside dioxygenase [EC:1.14.20.2] (BX6)
KO:K13645	procollagen-lysine,2-oxoglutarate 5-dioxygenase 2 [EC:1.14.11.4] (PLOD2)
KO:K13647	procollagen-lysine,2-oxoglutarate 5-dioxygenase, invertebrate [EC:1.14.11.4] (PLODN)
KO:K14252	NADPH-dependent dioxygenase [EC:1.14.-.-] (oxyL)
KO:K14578	naphthalene 1,2-dioxygenase system ferredoxin subunit (nahAb, nagAb, ndoA)
KO:K14579	naphthalene 1,2-dioxygenase subunit alpha [EC:1.14.12.12] (nahAc, ndoB)
KO:K14580	naphthalene 1,2-dioxygenase subunit beta [EC:1.14.12.12] (nahAd, ndoC)
KO:K14581	ferredoxin-NAD(P)+ reductase (naphthalene dioxygenase ferredoxin-specific) [EC:1.18.1.7] (nahAa, nagAa, ndoR)
KO:K14583	1,2-dihydroxynaphthalene dioxygenase [EC:1.13.11.56] (nahC)
KO:K14599	dibenzofuran dioxygenase alpha subunit [EC:1.14.12.-] (dbfA1)
KO:K14600	dibenzofuran dioxygenase beta subunit [EC:1.14.12.-] (dbfA2)
KO:K14602	2'-carboxy-2,3-dihydroxybiphenyl 1,2-dioxygenase large subunit (flnD1)
KO:K14603	2'-carboxy-2,3-dihydroxybiphenyl 1,2-dioxygenase small subunit and ferredoxin fusion protein (flnD2)
KO:K14748	ethylbenzene dioxygenase alpha subunit [EC:1.14.12.-] (etbAa)
KO:K14749	ethylbenzene dioxygenase beta subunit [EC:1.14.12.-] (etbAb)
KO:K14750	ethylbenzene dioxygenase ferredoxin subunit (etbAc)
KO:K14751	2,3-dihydroxyethylbenzene 1,2-dioxygenase [EC:1.13.11.-] (etbC)
KO:K15058	2-aminophenol/2-amino-5-chlorophenol 1,6-dioxygenase alpha subunit (amnA)
KO:K15059	2-aminophenol/2-amino-5-chlorophenol 1,6-dioxygenase beta subunit [EC:1.13.11.74 1.13.11.76] (amnB)
KO:K15065	3-O-methylgallate 3,4-dioxygenase [EC:1.13.11.-] (desZ)
KO:K15240	hydroquinone 1,2-dioxygenase [EC:1.13.11.66] (linE)
KO:K15242	2,6-dichloro-p-hydroquinone 1,2-dioxygenase [EC:1.13.11.-] (pcpA)
KO:K15247	chlorocatechol 1,2-dioxygenase [EC:1.13.11.-] (tfdC)
KO:K15248	chlorobenzene dioxygenase large subunit [EC:1.14.12.-] (tcbAa)
KO:K15249	chlorobenzene dioxygenase small subunit [EC:1.14.12.-] (tcbAb)
KO:K15250	chlorobenzene dioxygenase ferredoxin (tcbAc)
KO:K15251	chlorobenzene dioxygenase NADH-ferredoxin reductase (tcbAd)
KO:K15253	chlorocatechol 1,2-dioxygenase [EC:1.13.11.-] (tcbC)
KO:K15749	2,2',3-trihydroxybiphenyl dioxygenase [EC:1.13.11.-] (dbfB)
KO:K15750	biphenyl 2,3-dioxygenase beta subunit [EC:1.14.12.18] (bphAb, bphA2, bphE)
KO:K15751	carbazole 1,9a-dioxygenase, terminal dioxygenase component [EC:1.14.12.22] (carAa)
KO:K15752	carbazole 1,9a-dioxygenase, ferredoxin component (carAc)
KO:K15753	carbazole 1,9a-dioxygenase, ferredoxin reductase component (carAd)
KO:K15754	2'-aminobiphenyl-2,3-diol 1,2-dioxygenase, small subunit [EC:1.13.11.-] (carBa)
KO:K15755	2'-aminobiphenyl-2,3-diol 1,2-dioxygenase, large subunit [EC:1.13.11.-] (carBb)
KO:K15766	2-aminobenzenesulfonate 2,3-dioxygenase subunit alpha [EC:1.14.12.14] (absAa)
KO:K15767	2-aminobenzenesulfonate 2,3-dioxygenase subunit beta [EC:1.14.12.14] (absAb)
KO:K15777	4,5-DOPA dioxygenase extradiol [EC:1.13.11.-] (DOPA)
KO:K15972	tetracenomycin A2 monooxygenase-dioxygenase [EC:1.14.13.200] (tcmG, elmG)
KO:K16049	3,4-dihydroxy-9,10-secoandrosta-1,3,5(10)-triene-9,17-dione 4,5-dioxygenase [EC:1.13.11.25] (hsaC)
KO:K16268	benzene/toluene dioxygenase beta subunit [EC:1.14.12.3 1.14.12.11] (todC2, bedC2)
KO:K16270	3-methylcatechol 2,3-dioxygenase [EC:1.13.11.-] (todE)
KO:K16303	p-cumate 2,3-dioxygenase beta subunit [EC:1.14.12.-] (cmtAc)
KO:K16304	p-cumate 2,3-dioxygenase ferredoxin subunit (cmtAd)
KO:K16319	anthranilate 1,2-dioxygenase large subunit [EC:1.14.12.1] (andAc)
KO:K16320	anthranilate 1,2-dioxygenase small subunit [EC:1.14.12.1] (andAd)
KO:K16427	(3,5-dihydroxyphenyl)acetyl-CoA 1,2-dioxygenase [EC:1.13.11.80] (dpgC)
KO:K17725	sulfur dioxygenase [EC:1.13.11.18] (ETHE1)
KO:K17842	torulene dioxygenase [EC:1.13.11.59] (carT, CAO-2)
KO:K17912	9-cis-beta-carotene 9',10'-cleaving dioxygenase [EC:1.13.11.68] (CCD7)
KO:K17913	carlactone synthase / all-trans-10'-apo-beta-carotenal 13,14-cleaving dioxygenase [EC:1.13.11.69 1.13.11.70] (CCD8)
KO:K18028	2,5-dihydroxypyridine 5,6-dioxygenase [EC:1.13.11.9] (nicX)
KO:K18054	2'-deoxymugineic-acid 2'-dioxygenase / mugineic-acid 3-dioxygenase [EC:1.14.11.24 1.14.11.25] (IDS3_2)
KO:K18068	phthalate 4,5-dioxygenase oxygenase subunit [EC:1.14.12.7] (pht3)
KO:K18069	phthalate 4,5-dioxygenase reductase subunit [EC:1.18.1.-] (pht2)
KO:K18071	2-methyl-3-hydroxypyridine 5-carboxylic acid dioxygenase [EC:1.14.12.4] (mhpco)
KO:K18074	terephthalate 1,2-dioxygenase oxygenase component alpha subunit [EC:1.14.12.15] (tphA2)
KO:K18075	terephthalate 1,2-dioxygenase oxygenase component beta subunit [EC:1.14.12.15] (tphA3)
KO:K18077	terephthalate 1,2-dioxygenase reductase component [EC:1.18.1.-] (tphA1)
KO:K18087	biphenyl 2,3-dioxygenase ferredoxin subunit (bphAc, bphA3, bphF)
KO:K18088	biphenyl 2,3-dioxygenase ferredoxin reductase subunit [EC:1.18.1.3] (bphAd, bphA4, bphG)
KO:K18089	benzene/toluene dioxygenase ferredoxin subunit (todB)
KO:K18090	benzene/toluene dioxygenase ferredoxin reductase subunit [EC:1.18.1.3] (todA)
KO:K18227	p-cumate 2,3-dioxygenase ferredoxin reductase subunit [EC:1.18.1.3] (cmtAa)
KO:K18248	anthranilate 1,2-dioxygenase ferredoxin subunit (andAb)
KO:K18249	anthranilate 1,2-dioxygenase ferredoxin reductase subunit [EC:1.18.1.-] (andAa)
KO:K18251	phthalate 3,4-dioxygenase alpha subunit [EC:1.14.12.-] (phtAa)
KO:K18252	phthalate 3,4-dioxygenase beta subunit [EC:1.14.12.-] (phtAb)
KO:K18253	phthalate 3,4-dioxygenase ferredoxin subunit (phtAc)
KO:K18254	phthalate 3,4-dioxygenase ferredoxin reductase subunit [EC:1.18.1.3] (phtAd)
KO:K18562	2-oxoglutarate-dependent dioxygenase [EC:1.14.20.-] (thnQ, cmmQ)
KO:K18565	2-oxoglutarate-dependent dioxygenase [EC:1.14.20.-] (thnG, cmmG)
KO:K19245	sulfonate dioxygenase [EC:1.14.11.-] (JLP1)
KO:K19469	alpha-ketoglutarate-dependent dioxygenase FTO [EC:1.14.11.-] (FTO)

## Sheet: Lyases
KO ID	KO Name
KO:K00221	alkylmercury lyase [EC:4.99.1.2] (E4.99.1.2)
KO:K00816	kynurenine---oxoglutarate transaminase / cysteine-S-conjugate beta-lyase / glutamine---phenylpyruvate transaminase [EC:2.6.1.7 4.4.1.13 2.6.1.64] (CCBL)
KO:K01252	bifunctional isochorismate lyase / aryl carrier protein [EC:3.3.2.1] (entB, dhbB, vibB, mxcF)
KO:K01483	ureidoglycolate lyase [EC:4.3.2.3] (allA)
KO:K01637	isocitrate lyase [EC:4.1.3.1] (E4.1.3.1, aceA)
KO:K01639	N-acetylneuraminate lyase [EC:4.1.3.3] (E4.1.3.3, nanA, NPL)
KO:K01640	hydroxymethylglutaryl-CoA lyase [EC:4.1.3.4] (E4.1.3.4, HMGCL, hmgL)
KO:K01643	citrate lyase subunit alpha / citrate CoA-transferase [EC:2.8.3.10] (citF)
KO:K01644	citrate lyase subunit beta / citryl-CoA lyase [EC:4.1.3.34] (citE)
KO:K01646	citrate lyase subunit gamma (acyl carrier protein) (citD)
KO:K01648	ATP citrate (pro-S)-lyase [EC:2.3.3.8] (ACLY)
KO:K01668	tyrosine phenol-lyase [EC:4.1.99.2] (E4.1.99.2)
KO:K01669	deoxyribodipyrimidine photo-lyase [EC:4.1.99.3] (phrB)
KO:K01725	cyanate lyase [EC:4.2.1.104] (cynS)
KO:K01727	hyaluronate lyase [EC:4.2.2.1] (hysA, hylA, hylB)
KO:K01728	pectate lyase [EC:4.2.2.2] (pel)
KO:K01729	poly(beta-D-mannuronate) lyase [EC:4.2.2.3] (algL)
KO:K01730	oligogalacturonide lyase [EC:4.2.2.6] (ogl)
KO:K01731	pectate disaccharide-lyase [EC:4.2.2.9] (pelW)
KO:K01732	pectin lyase [EC:4.2.2.10] (E4.2.2.10)
KO:K01740	O-acetylhomoserine (thiol)-lyase [EC:2.5.1.49] (E2.5.1.49, metY)
KO:K01741	DNA-(apurinic or apyrimidinic site) lyase [EC:4.2.99.18] (E4.2.99.18)
KO:K01744	aspartate ammonia-lyase [EC:4.3.1.1] (aspA)
KO:K01745	histidine ammonia-lyase [EC:4.3.1.3] (hutH, HAL)
KO:K01751	diaminopropionate ammonia-lyase [EC:4.3.1.15] (E4.3.1.15)
KO:K01755	argininosuccinate lyase [EC:4.3.2.1] (argH, ASL)
KO:K01756	adenylosuccinate lyase [EC:4.3.2.2] (purB, ADSL)
KO:K01758	cystathionine gamma-lyase [EC:4.4.1.1] (CTH)
KO:K01759	lactoylglutathione lyase [EC:4.4.1.5] (GLO1, gloA)
KO:K01760	cystathionine beta-lyase [EC:4.4.1.8] (metC)
KO:K01761	methionine-gamma-lyase [EC:4.4.1.11] (E4.4.1.11)
KO:K01763	selenocysteine lyase [EC:4.4.1.16] (SCLY)
KO:K01764	cytochrome c heme-lyase [EC:4.4.1.17] (E4.4.1.17)
KO:K01910	[citrate (pro-3S)-lyase] ligase [EC:6.2.1.22] (citC)
KO:K02288	phycocyanobilin lyase alpha subunit [EC:4.-.-.-] (cpcE)
KO:K02289	phycocyanobilin lyase beta subunit (cpcF)
KO:K02619	4-amino-4-deoxychorismate lyase [EC:4.1.3.38] (pabC)
KO:K03181	chorismate--pyruvate lyase [EC:4.1.3.40] (ubiC)
KO:K03342	para-aminobenzoate synthetase / 4-amino-4-deoxychorismate lyase [EC:2.6.1.85 4.1.3.38] (pabBC)
KO:K03417	methylisocitrate lyase [EC:4.1.3.30] (prpB)
KO:K03653	N-glycosylase/DNA lyase [EC:3.2.2.- 4.2.99.18] (K03653)
KO:K03660	N-glycosylase/DNA lyase [EC:3.2.2.- 4.2.99.18] (OGG1)
KO:K03716	spore photoproduct lyase [EC:4.1.99.14] (splB)
KO:K03735	ethanolamine ammonia-lyase large subunit [EC:4.3.1.7] (eutB)
KO:K03736	ethanolamine ammonia-lyase small subunit [EC:4.3.1.7] (eutC)
KO:K04069	pyruvate formate lyase activating enzyme [EC:1.97.1.4] (pflA, pflC, pflE)
KO:K04070	putative pyruvate formate lyase activating enzyme [EC:1.97.1.4] (pflX)
KO:K04782	isochorismate pyruvate lyase [EC:4.2.99.21] (pchB)
KO:K04835	methylaspartate ammonia-lyase [EC:4.3.1.2] (mal)
KO:K05906	prenylcysteine oxidase / farnesylcysteine lyase [EC:1.8.3.5 1.8.3.6] (PCYOX1, FCLY)
KO:K06038	glycosylphosphatidylinositol diacylglycerol-lyase [EC:4.6.1.14] (E4.6.1.14)
KO:K06163	alpha-D-ribose 1-methylphosphonate 5-phosphate C-P lyase [EC:4.7.1.1] (phnJ)
KO:K06315	transcriptional regulator of the spore photoproduct lyase operon (splA)
KO:K06876	deoxyribodipyrimidine photolyase-related protein (K06876)
KO:K07173	S-ribosylhomocysteine lyase [EC:4.4.1.21] (luxS)
KO:K08248	mandelonitrile lyase [EC:4.1.2.10] (E4.1.2.10)
KO:K08249	hydroxymandelonitrile lyase [EC:4.1.2.11] (E4.1.2.11)
KO:K08691	malyl-CoA/(S)-citramalyl-CoA lyase [EC:4.1.3.24 4.1.3.25] (mcl)
KO:K08961	chondroitin-sulfate-ABC endolyase/exolyase [EC:4.2.2.20 4.2.2.21] (K08961)
KO:K10528	hydroperoxide lyase [EC:4.1.2.-] (HPL)
KO:K10713	5,6,7,8-tetrahydromethanopterin hydro-lyase [EC:4.2.1.147] (fae)
KO:K10774	tyrosine ammonia-lyase [EC:4.3.1.23] (E4.3.1.23)
KO:K10775	phenylalanine ammonia-lyase [EC:4.3.1.24] (E4.3.1.24)
KO:K11325	L-cysteine/cystine lyase (K11325)
KO:K11390	citrate lyase subunit beta-like protein [EC:4.1.-.-] (CLYBL)
KO:K11717	cysteine desulfurase / selenocysteine lyase [EC:2.8.1.7 4.4.1.16] (sufS)
KO:K11819	S-alkyl-thiohydroximate lyase SUR1 [EC:4.4.1.-] (SUR1, RTY)
KO:K12261	2-hydroxyacyl-CoA lyase 1 [EC:4.1.-.-] (HACL1)
KO:K13033	(S)-hydroxynitrile lyase [EC:4.1.2.47] (E4.1.2.47)
KO:K13064	phenylalanine/tyrosine ammonia-lyase [EC:4.3.1.25] (PTAL)
KO:K13222	indole-3-glycerol-phosphate lyase [EC:4.1.2.8] (BX1, IGL)
KO:K13309	dTDP-4-amino-4,6-dideoxy-D-glucose ammonia-lyase [EC:4.3.1.30] (desII)
KO:K13450	phosphothreonine lyase [EC:4.2.3.-] (ospF, mkaD, spvC)
KO:K14155	cystathione beta-lyase [EC:4.4.1.8] (patB, malY)
KO:K14286	ethanolamine-phosphate phospho-lyase [EC:4.2.3.2] (AGXT2L1, ETNPPL)
KO:K14577	aliphatic (R)-hydroxynitrile lyase [EC:4.1.2.46] (E4.1.2.46)
KO:K14681	argininosuccinate lyase / amino-acid N-acetyltransferase [EC:4.3.2.1 2.3.1.1] (argHA)
KO:K15230	ATP-citrate lyase alpha-subunit [EC:2.3.3.8] (aclA)
KO:K15231	ATP-citrate lyase beta-subunit [EC:2.3.3.8] (aclB)
KO:K15234	citryl-CoA lyase [EC:4.1.3.34] (ccl)
KO:K15513	benzoyl-CoA-dihydrodiol lyase [EC:4.1.2.44] (boxC)
KO:K15827	formate hydrogenlyase subunit 2 (hycB)
KO:K15828	formate hydrogenlyase subunit 3 (hycC)
KO:K15829	formate hydrogenlyase subunit 4 (hycD)
KO:K15830	formate hydrogenlyase subunit 5 (hycE)
KO:K15831	formate hydrogenlyase subunit 6 (hycF)
KO:K15832	formate hydrogenlyase subunit 7 (hycG)
KO:K15833	formate hydrogenlyase regulatory protein HycA (hycA)
KO:K15834	formate hydrogenlyase maturation protein HycH (hycH)
KO:K15836	formate hydrogenlyase transcriptional activator (fhlA)
KO:K16845	(2R)-sulfolactate sulfo-lyase subunit alpha [EC:4.4.1.24] (suyA)
KO:K16846	(2R)-sulfolactate sulfo-lyase subunit beta [EC:4.4.1.24] (suyB)
KO:K16856	ureidoglycolate lyase [EC:4.3.2.3] (ugl)
KO:K17217	cystathionine gamma-lyase / homocysteine desulfhydrase [EC:4.4.1.1 4.4.1.2] (mccB)
KO:K17468	D-glucosaminate-6-phosphate ammonia-lyase [EC:4.3.1.29] (dgaE)
KO:K17950	L-cysteate sulfo-lyase [EC:4.4.1.25] (cuyA)
KO:K17989	L-serine/L-threonine ammonia-lyase [EC:4.3.1.17 4.3.1.19] (SDS, SDH, CHA1)
KO:K18014	3-aminobutyryl-CoA ammonia-lyase [EC:4.3.1.14] (kal)
KO:K18195	rhamnogalacturonan endolyase [EC:4.2.2.23] (RGL4, rhiE)
KO:K18197	rhamnogalacturonan endolyase [EC:4.2.2.23] (yesW)
KO:K18198	rhamnogalacturonan exolyase [EC:4.2.2.24] (yesX)
KO:K18200	peptidylamidoglycolate lyase [EC:4.3.2.5] (PAL)
KO:K18202	5-phosphonooxy-L-lysine phospho-lyase [EC:4.2.3.134] (AGXT2L2)
KO:K18235	virginiamycin B lyase [EC:4.2.99.-] (vgb)
KO:K18240	chorismate lyase / 3-hydroxybenzoate synthase [EC:4.1.3.40 4.1.3.45] (XanB2)
KO:K18292	(S)-citramalyl-CoA lyase [EC:4.1.3.25] (E4.1.3.25)
KO:K18314	(R)-citramalyl-CoA lyase [EC:4.1.3.46] (E4.1.3.46, ccl)
KO:K18482	4-amino-4-deoxychorismate lyase [EC:4.1.3.38] (ADCL)
KO:K18805	chorismate lyase [EC:4.1.3.40] (K18805)
KO:K18913	pyridoxal 5-phosphate dependent beta-lyase (egtE)
KO:K19049	chondroitin AC lyase [EC:4.2.2.5] (cslA)
KO:K19050	heparin lyase [EC:4.2.2.7] (hepA)
KO:K19051	heparin/heparan-sulfate lyase [EC:4.2.2.7 4.2.2.8] (hepB)
KO:K19052	heparan-sulfate lyase [EC:4.2.2.8] (hepC)
KO:K19053	chondroitin B lyase [EC:4.2.2.19] (cslB)
KO:K19281	beta-methylmalyl-CoA/(S)-malyl-CoA lyase [EC:4.1.3.24] (mcl)
KO:K19282	bifunctional (S)-malyl-CoA lyase/thioesterase [EC:4.1.3.24 3.1.2.30] (aceB)
KO:K19551	pectate lyase C [EC:4.2.2.2 4.2.2.10] (pelC)
